# Supplementary material for: The Alarm Pheromone and Alarm Response of the Clonal Raider Ant
Source: PubMed Central journal article supplement (PMC9941220; doi:10.1007/s10886-023-01407-4), 2023-02-10

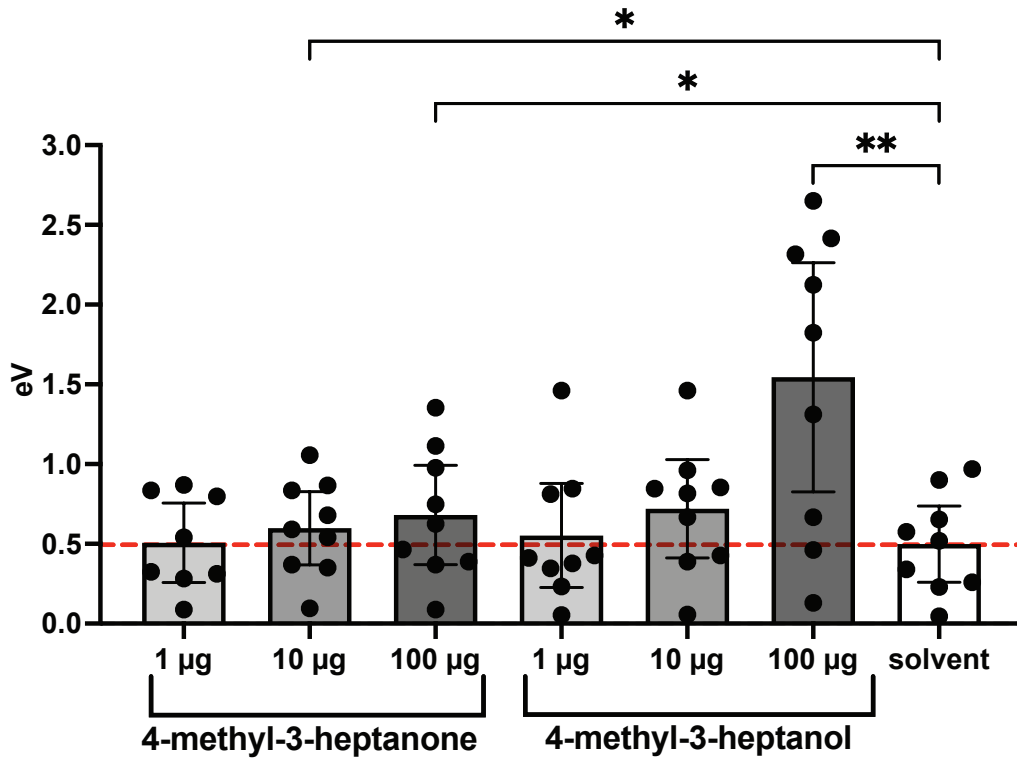

Supplement: 10886_2023_1407_MOESM11_ESM.pdf [file 10886_2023_1407_MOESM11_ESM.pdf]
